# Supplementary material for: Peroxisome Proliferator-Activated Receptor α Attenuates Hypertensive Vascular Remodeling by Protecting Vascular Smooth Muscle Cells from Angiotensin II-Induced ROS Production
Source: MDPI journal article supplement (doi:10.3390/antiox11122378), 2022-11-30
Supplement: s1 [file s1]

**Table S1.** The composition of chow diet.

| Composition        | Content (%) |
|--------------------|-------------|
| <i>protein</i>     | ≥18         |
| <i>fat</i>         | ≥4          |
| <i>Crude fibre</i> | ≤5          |
| <i>Coarse ash</i>  | ≤8          |
| <i>Water</i>       | ≤10         |
| <i>Lysine</i>      | ≥0.82       |
| <i>Calcium</i>     | 1.0-1.8     |
| <i>Phosphorus</i>  | 0.6-1.2     |
| <i>Salt</i>        | 0.3-0.8     |

**Table S2.** Primer sequence.

| Gene         | Accession number | Primer Sequence (5'-3')                            |
|--------------|------------------|----------------------------------------------------|
| <i>Actb</i>  | NM_007393.5      | F: TTCTTTGCAGCTCCTTCGTT<br>R: ATGGAGGGGAATACAGCCC  |
| <i>Nox4</i>  | NM_001285833.1   | F: CTGGAAAACCTTCCTGCTGT<br>R: TCAGGACAGATGCAGATGCT |
| <i>Ppara</i> | NM_001113418.1   | F: CCCTGAACATCGAGTGCGAA<br>R: TTCGCCGAAAGAAGCCCTTA |

Supplementary figures

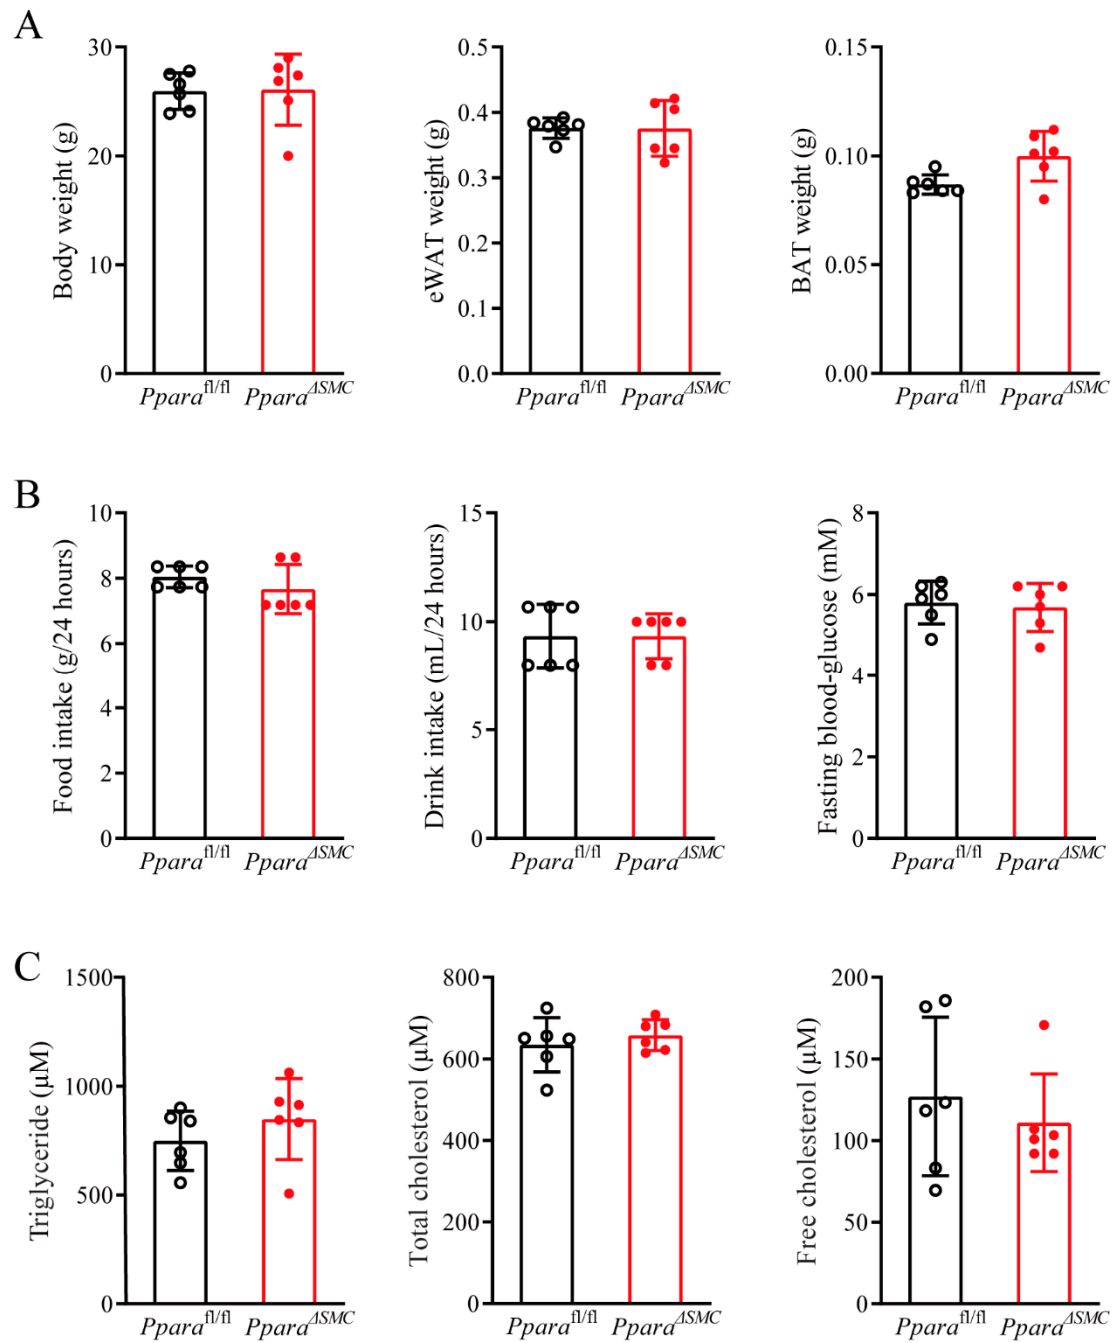

**Supplementary Figure S1. The metabolic general parameters of *Ppara*<sup>ASMC</sup> and *Ppara*<sup>fl/fl</sup> mice. (A)** Body Weight, eWAT(white adipose tissue), and BAT(brown adipose tissue), **(B)** Food intake, drink intake, and fasting blood-glucose in 2-month-old *Ppara*<sup>ASMC</sup> and *Ppara*<sup>fl/fl</sup> mice. **(C)** Triglyceride, total cholesterol, and free cholesterol in plasma of 2-month-old *Ppara*<sup>ASMC</sup> and *Ppara*<sup>fl/fl</sup> mice. (n=6).

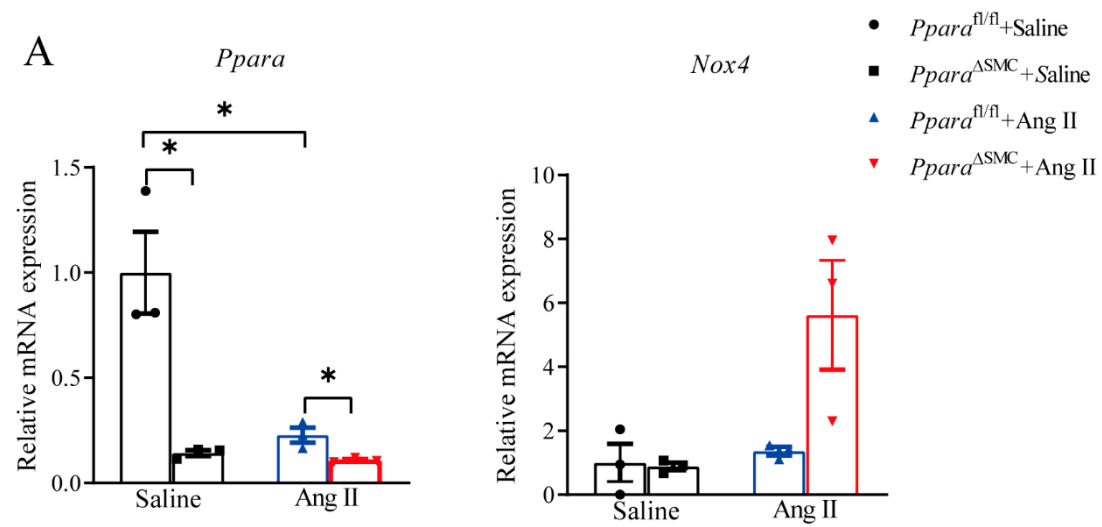

**Supplementary Figure S2.** PPAR $\alpha$  deficiency in VSMCs aggravated Ang II-induced the vascular elevation of *Nox4* (A) The mRNA level of *Ppara* and *Nox4* in VSMCs from *Ppara*<sup>ASMC</sup> and *Ppara*<sup>fl/fl</sup> mice were treated with Ang II (1  $\mu$ mol/L) for 24 hours. (n = 3, two-way ANOVA). Data are means  $\pm$  SEM. \* p < 0.05 between groups.

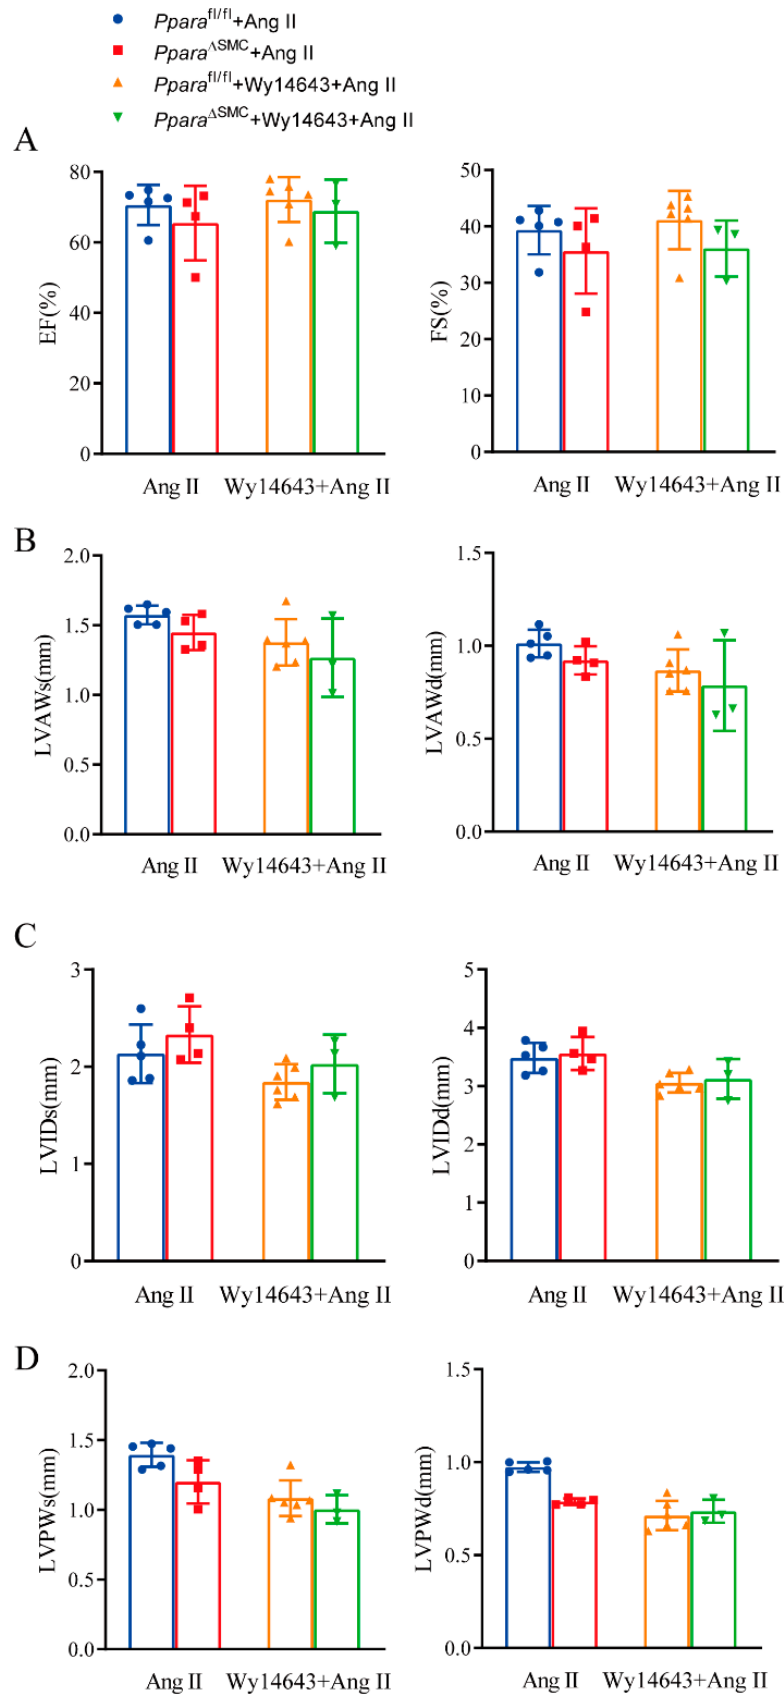

**Supplementary Figure S3.** Activation of PPAR $\alpha$  by Wy14643 had no effect on Ang II-induced cardiac dysfunction. (A) EF and FS were assessed by two-dimensional echocardiography after Wy14643 diet. (B) LVAWs and LVAWd. (C) LVIDs and LVIDd, (D) LVPWs and LVPWd are recorded and analyzed (n = 3-6).
